# Supplementary material for: Classification and Functional Analysis between Cancer and Normal Tissues Using Explainable Pathway Deep Learning through RNA-Sequencing Gene Expression
Source: MDPI journal article supplement (doi:10.3390/ijms222111531), 2021-10-26
Supplement: s1 [file s1]

**Table S4   Gene Expression Data**

| <b>Project</b>   | <b>Normal</b> | <b>Cancer</b> | <b>Total</b>  |
|------------------|---------------|---------------|---------------|
| GTE <sub>x</sub> | 7,429         | 363           | 7,792         |
| K-562            | 0             | 70            | 70            |
| TARGET           | 11            | 723           | 734           |
| TCGA             | 727           | 9,808         | 10,535        |
| <b>Total</b>     | <b>8,167</b>  | <b>10,964</b> | <b>19,131</b> |
