# Supplementary material for: Classification and Functional Analysis between Cancer and Normal Tissues Using Explainable Pathway Deep Learning through RNA-Sequencing Gene Expression
Source: MDPI journal article supplement (doi:10.3390/ijms222111531), 2021-10-26
Supplement: s1 [file s1]

**Table S1 Pathway contribution gene index**

| Gene symbol     | Pathway contribution gene |
|-----------------|---------------------------|
|                 | index                     |
| <i>PLA2G10</i>  | 1.149                     |
| <i>SHC1</i>     | 0.904                     |
| <i>CDK1</i>     | 0.846                     |
| <i>CD4</i>      | 0.779                     |
| <i>APOA1</i>    | 0.721                     |
| <i>HIST1H3A</i> | 0.663                     |
| <i>CDC16</i>    | 0.647                     |
| <i>LHB</i>      | 0.622                     |
| <i>PLA2G2E</i>  | 0.616                     |
| <i>ORC6</i>     | 0.610                     |
| <i>HIST1H4K</i> | 0.557                     |
| <i>GNG11</i>    | 0.542                     |
| <i>TPM1</i>     | 0.537                     |
| <i>CHRNA4</i>   | 0.525                     |
| <i>CALM1</i>    | 0.520                     |
| <i>CAN</i>      | 0.519                     |
| <i>HLA</i>      | 0.508                     |
| <i>HIST1H4D</i> | 0.495                     |
| <i>PLA2G4D</i>  | 0.489                     |
| <i>MYH6</i>     | 0.487                     |
| <i>MCM6</i>     | 0.479                     |

|                   |       |
|-------------------|-------|
| <i>TPM3</i>       | 0.479 |
| <i>FGF3</i>       | 0.477 |
| <i>CDC45</i>      | 0.477 |
| <i>ABCG1</i>      | 0.468 |
| <i>PPP2R1B</i>    | 0.456 |
| <i>CTNNB1</i>     | 0.453 |
| <i>HYAL1</i>      | 0.452 |
| <i>PLA2G12A</i>   | 0.450 |
| <i>NRP2</i>       | 0.450 |
| <i>HIST1H4I</i>   | 0.447 |
| <i>LCAT</i>       | 0.443 |
| <i>RAC1</i>       | 0.435 |
| <i>CD3E</i>       | 0.433 |
| <i>MBL2</i>       | 0.430 |
| <i>SI</i>         | 0.428 |
| <i>GNGT2</i>      | 0.427 |
| <i>RAP1A</i>      | 0.412 |
| <i>CYP21A2</i>    | 0.410 |
| <i>PRKCI</i>      | 0.410 |
| <i>CDC25C</i>     | 0.406 |
| <i>GNAS</i>       | 0.400 |
| <i>STAT1</i>      | 0.397 |
| <i>HIST2H2AA4</i> | 0.397 |
| <i>CHRNA3</i>     | 0.396 |

|                |       |
|----------------|-------|
| <i>CDH3</i>    | 0.394 |
| <i>HAAO</i>    | 0.391 |
| <i>OGN</i>     | 0.390 |
| <i>PLA2G2A</i> | 0.388 |
| <i>PSMD13</i>  | 0.383 |
| <i>PSMF1</i>   | 0.382 |
| <i>PAK1</i>    | 0.381 |
| <i>DHFR</i>    | 0.379 |
| <i>PPP2R5D</i> | 0.376 |
| <i>CCNE1</i>   | 0.373 |
| <i>CRP</i>     | 0.371 |
| <i>HTR7</i>    | 0.368 |

---
