# Supplementary material for: Classification and Functional Analysis between Cancer and Normal Tissues Using Explainable Pathway Deep Learning through RNA-Sequencing Gene Expression
Source: MDPI journal article supplement (doi:10.3390/ijms222111531), 2021-10-26
Supplement: s1 [file s1]

**Table S2 Pathway contribution gene index Top 1% Enrichment test (FDR < 1E-03)**

| <b>Function</b>                                    | <b>FDR</b> |
|----------------------------------------------------|------------|
| G1/S transition of mitotic cell cycle              | 1.03E-12   |
| DNA replication                                    | 2.52E-12   |
| DNA-dependent DNA replication                      | 1.25E-09   |
| DNA strand elongation involved in DNA replication  | 2.89E-09   |
| DNA strand elongation                              | 4.15E-09   |
| MCM complex                                        | 4.15E-09   |
| phosphatidylinositol acyl-chain remodeling         | 6.07E-08   |
| phosphatidylserine acyl-chain remodeling           | 7.28E-08   |
| phosphatidylglycerol acyl-chain remodeling         | 7.28E-08   |
| cellular amine metabolic process                   | 1.12E-07   |
| amine metabolic process                            | 1.35E-07   |
| phosphatidylcholine metabolic process              | 1.35E-07   |
| phosphatidylethanolamine acyl-chain remodeling     | 4.04E-07   |
| phosphatidylserine metabolic process               | 4.98E-07   |
| ethanolamine-containing compound metabolic process | 5.66E-07   |
| phosphatidylcholine acyl-chain remodeling          | 5.72E-07   |
| cellular biogenic amine metabolic process          | 6.11E-07   |
| alditol phosphate metabolic process                | 8.44E-07   |
| phosphatidic acid biosynthetic process             | 1.21E-06   |
| phosphatidic acid metabolic process                | 1.21E-06   |
| Sarcomere                                          | 1.50E-06   |

|                                                |          |
|------------------------------------------------|----------|
| phosphatidylglycerol metabolic process         | 2.54E-06 |
| Myofibril                                      | 4.89E-06 |
| alcohol metabolic process                      | 4.89E-06 |
| contractile fiber part                         | 4.89E-06 |
| contractile fiber                              | 9.82E-06 |
| cellular modified amino acid metabolic process | 6.66E-05 |
| striated muscle thin filament                  | 1.02E-04 |
| Myofilament                                    | 2.49E-04 |
| muscle filament sliding                        | 2.53E-04 |
| actin-myosin filament sliding                  | 2.53E-04 |
| glycerophospholipid biosynthetic process       | 3.64E-04 |
| DNA replication initiation                     | 4.61E-04 |
| phospholipid biosynthetic process              | 5.30E-04 |
| actin-mediated cell contraction                | 6.48E-04 |
| regulation of transcription involved in G1/S   |          |
| transition of mitotic cell cycle               | 8.81E-04 |
| plasma lipoprotein particle remodeling         | 8.81E-04 |
| protein-lipid complex remodeling               | 8.81E-04 |
| macromolecular complex remodeling              | 8.81E-04 |
| glycerophospholipid metabolic process          | 9.03E-04 |
| glycerolipid biosynthetic process              | 9.77E-04 |

---
