# Supplementary material for: Classification and Functional Analysis between Cancer and Normal Tissues Using Explainable Pathway Deep Learning through RNA-Sequencing Gene Expression
Source: MDPI journal article supplement (doi:10.3390/ijms222111531), 2021-10-26
Supplement: s1 [file s1]

**Table S3 Cancer-related c2 reactome 42 pathways and one sample z-test FDR q-value of pathways (FDR q-value < 0.05)**

| Pathway                                                   | FDR<br>q-value |
|-----------------------------------------------------------|----------------|
| REACTOME_GPCR_DOWNSTREAM_SIGNALING                        | 0              |
| REACTOME_GPCR_LIGAND_BINDING                              | 4.54E-100      |
| REACTOME_NEURONAL_SYSTEM                                  | 9.86E-73       |
| REACTOME_SLC_MEDIATED_TRANSMEMBRANE_TRANSPORT             | 1.10E-64       |
| REACTOME_SIGNALING_BY_EGFR_IN_CANCER                      | 4.13E-55       |
| REACTOME_AXON_GUIDANCE                                    | 6.81E-53       |
| REACTOME_PEPTIDE_LIGAND_BINDING_RECEPTORS                 | 1.31E-29       |
| REACTOME_DIABETES_PATHWAYS                                | 9.06E-20       |
| REACTOME_GASTRIN_CREB_SIGNALLING_PATHWAY_VIA_PKC_AND_MAPK | 4.20E-17       |
| REACTOME_SIGNALING_BY_FGFR_MUTANTS                        | 9.46E-17       |
| REACTOME_COLLAGEN_FORMATION                               | 3.74E-16       |
| REACTOME_FATTY_ACYL_COA_BIOSYNTHESIS                      | 3.42E-15       |
| REACTOME_CIRCADIAN_REPRESSION_OF_EXPRESSION_BY_REV_ERBA   | 8.17E-12       |
| REACTOME_NFKB_IS_ACTIVATED_AND_SIGNALS_SURVIVAL           | 1.73E-11       |
| REACTOME_ACETYLCHOLINE_BINDING_AND_DOWNSTREAM_EVENTS      | 6.24E-11       |

---

|                                                        |           |
|--------------------------------------------------------|-----------|
| REACTOME_G_ALPHA_Q_SIGNALLING_EVENTS                   | 2.89E-09  |
| REACTOME_METABOLISM_OF_CARBOHYDRATES                   | 6.25E-09  |
| REACTOME_STRIATED_MUSCLE_CONTRACTION                   | 1.78E-08  |
| REACTOME_PI_3K_CASCADE                                 | 1.02E-07  |
| REACTOME_NUCLEAR_SIGNALING_BY_ERBB4                    | 4.35E-06  |
| REACTOME_DEGRADATION_OF_THE_EXTRACELLULAR_MATRIX       | 4.63E-06  |
| REACTOME_ACYL_CHAIN_REMODELLING_OF_PE                  | 2.90E-05  |
| REACTOME_VEGF_LIGAND_RECEPTOR_INTERACTIONS             | 6.52E-05  |
| REACTOME_PRESYNAPTIC_NICOTINIC_ACETYLCHOLINE_RECEPTORS | 6.64E-05  |
| REACTOME_SIGNALING_BY_NOTCH3                           | 1.42.E-04 |
| REACTOME_MUSCLE_CONTRACTION                            | 1.54.E-04 |
| REACTOME_ACYL_CHAIN_REMODELLING_OF_PG                  | 3.08.E-04 |
| REACTOME_BRANCHED_CHAIN_AMINO_ACID_CATABOLISM          | 3.75.E-04 |
| REACTOME_ENDOGENOUS_STEROLS                            | 3.84.E-04 |
| REACTOME_PURINE_CATABOLISM                             | 9.34.E-04 |
| REACTOME_G_ALPHA_I_SIGNALLING_EVENTS                   | 1.97.E-03 |
| REACTOME_BIOLOGICAL_OXIDATIONS                         | 5.20.E-03 |
| REACTOME_BASE_EXCISION_REPAIR                          | 5.73.E-03 |
| REACTOME_MITOCHONDRIAL_FATTY_ACID_BETA_OXIDATION       | 5.79.E-03 |

---

---

|                                           |           |
|-------------------------------------------|-----------|
| REACTOME_EARLY_PHASE_OF_HIV_LIFE_CYCLE    | 7.53.E-03 |
| REACTOME_PTM_GAMMA_CARBOXYLATION_HYPUSI   | 7.71.E-03 |
| NE_FORMATION_AND_ARYLSULFATASE_ACTIVATION |           |
| REACTOME_ADENYLATE_CYCLASE_INHIBITORY_PAT | 1.22.E-02 |
| HWAY                                      |           |
| REACTOME_A_TETRASACCHARIDE_LINKER_SEQUEN  | 1.29.E-02 |
| CE_IS_REQUIRED_FOR_GAG_SYNTHESIS          |           |
| REACTOME_GLYCOPROTEIN_HORMONES            | 3.54.E-02 |
| REACTOME_ERKS_ARE_INACTIVATED             | 3.57.E-02 |
| REACTOME_ACTIVATION_OF_GENES_BY_ATF4      | 3.64.E-02 |
| REACTOME_PLATELET_SENSITIZATION_BY_LDL    | 4.16.E-02 |

---
