# Supplementary material for: Classification and Functional Analysis between Cancer and Normal Tissues Using Explainable Pathway Deep Learning through RNA-Sequencing Gene Expression
Source: MDPI journal article supplement (doi:10.3390/ijms222111531), 2021-10-26
Supplement: s1 [file s1]

**Table S5 MSigDB with TCGA TARGET GTEx**

| <b>Molecular signature collection</b> | <b>Number of Pathway</b> | <b>Number of Pathway Member genes</b> | <b>Number of pathway member genes common to TCGA TARGET GTEx genes</b> |
|---------------------------------------|--------------------------|---------------------------------------|------------------------------------------------------------------------|
| c2 reactome                           | 674                      | 6,025                                 | 5,796                                                                  |
| c2 kegg                               | 186                      | 5,266                                 | 5,227                                                                  |
| c4 cgn                                | 427                      | 4,880                                 | 4,756                                                                  |
| c1 positional                         | 326                      | 30,010                                | 22,197                                                                 |
| c2 cgp                                | 3,433                    | 20,623                                | 18,512                                                                 |
| c2 cp                                 | 1,329                    | 8,904                                 | 1,275                                                                  |
| c2 cp biocarta                        | 217                      | 1,279                                 | 8,620                                                                  |
| c3 mir                                | 221                      | 7,444                                 | 7,135                                                                  |
| c3 tft                                | 615                      | 12,774                                | 12,180                                                                 |
| c4 cm                                 | 431                      | 8,405                                 | 8,142                                                                  |
| c5 GO bp                              | 4,436                    | 15,578                                | 15,005                                                                 |
| c5 GO cc                              | 580                      | 12,198                                | 11,722                                                                 |
| c5 GO mf                              | 901                      | 14,549                                | 14,081                                                                 |
| c6 oncogenic signatures               | 189                      | 11,250                                | 10,570                                                                 |
| c7 immunologic signatures             | 4,872                    | 20,652                                | 18,141                                                                 |
